# Supplementary material for: A Joint Vehicle Routing and Speed Optimization Problem
Source: Atypon-hosted journal article supplement (doi:10.1287/ijoc.2018.0810), 2018-11-01
Supplement: ijoc.2018.0810-sm.pdf [file ijoc.2018.0810-sm.pdf]

# Online Supplement to “A Joint Vehicle Routing and Speed Optimization Problem”

Ricardo Fukasawa,\* Qie He† Fernando Santos‡ Yongjia Song§

This is an online supplement to the main paper [1].

## 1 Proof of Proposition 1

We prove the statement by contradiction. Suppose the speed optimization problem (3) has an optimal speed vector  $\mathbf{v}$  with three consecutive vertices  $j, i, k$  such that customer  $i$  is non-active ( $t_i \in (a_i, b_i)$ ) and  $v_{ji} \neq v_{ik}$ . We show that we can create a new feasible speed vector with a strictly lower cost than the optimal speed vector. The new speed vector differs from the optimal speed vector only by the speeds on arcs  $(j, i)$  and  $(i, k)$ .

Let the departure time at vertex  $j$  be  $T_j$  and the arriving time at vertex  $k$  be  $T_k$ . We first assume that  $v_{ji} < v_{ik} \leq u$ . The cost over arcs  $(j, i)$  and  $(i, k)$  is  $d_{ji}f(v_{ji}) + d_{ik}f(v_{ik})$ . We create two new speeds  $v'_{ji} = v_{ji} + d_{ik}\delta$  and  $v'_{ik} = v_{ik} - d_{ji}\delta$  with

$$0 < \delta < \min\left\{\frac{v_{ik} - v_{ji}}{d_{ik}}, \frac{v_{ik} - v_{ji}}{d_{ji}}, \frac{v_{ik}^2 - v_{ji}^2}{v_{ji}d_{ik} + v_{ik}d_{ji}}\right\}.$$

We will show that with these two new speeds, the vehicle is able to depart vertex  $j$  at time  $T_j$ , serve customer  $i$  within its time window, arrive at node  $k$  at time  $T_k$ , and incur a lower cost over arcs  $(j, i)$  and  $(i, k)$ .

According to the choice of  $\delta$ , we have  $v'_{ji}, v'_{ik} \in (v_{ji}, v_{ik})$ , so  $v'_{ji}$  and  $v'_{ik}$  are feasible speeds. Since the function  $f(v)$  is strictly convex in  $v$ , then

$$\frac{f(v'_{ji}) - f(v_{ji})}{d_{ik}\delta} = \frac{f(v_{ji} + d_{ik}\delta) - f(v_{ji})}{d_{ik}\delta} < \frac{f(v_{ik}) - f(v_{ik} - d_{ji}\delta)}{d_{ji}\delta} = \frac{f(v_{ik}) - f(v'_{ik})}{d_{ji}\delta}.$$

Thus  $d_{ji}f(v'_{ji}) + d_{ik}f(v'_{ik}) < d_{ji}f(v_{ji}) + d_{ik}f(v_{ik})$ , which implies the new speeds incur less cost on the route. Now we show that with the new speeds, the vehicle is able to leave vertex  $j$  at  $T_j$  and arrive at vertex  $k$  at time  $T_k$ . The original travel time over arcs  $(j, i)$  and  $(i, k)$  is

$$T = \frac{d_{ji}}{v_{ji}} + \frac{d_{ik}}{v_{ik}},$$

---

\*Department of Combinatorics and Optimization, Faculty of Mathematics, University of Waterloo. Email: rfukasawa@uwaterloo.ca.

†Department of Industrial and Systems Engineering, University of Minnesota. Email: qhe@umn.edu.

‡Department of Engineering, Federal University of Itajubá - Campus Itabira. Email: fernandosantos@unifei.edu.br.

§Department of Statistical Sciences and Operations Research, Virginia Commonwealth University. Email: ysong3@vcu.edu.

and the travel time with the new speeds is

$$T' = \frac{d_{ji}}{v_{ji} + d_{ik}\delta} + \frac{d_{ik}}{v_{ik} - d_{ji}\delta}.$$

Then

$$\begin{aligned} T' - T &= \frac{d_{ji}}{v_{ji} + d_{ik}\delta} + \frac{d_{ik}}{v_{ik} - d_{ji}\delta} - \left( \frac{d_{ji}}{v_{ji}} + \frac{d_{ik}}{v_{ik}} \right) \\ &= \frac{d_{ji}d_{ik}\delta[(v_{ji}d_{ik} + v_{ik}d_{ji})\delta - (v_{ik}^2 - v_{ji}^2)]}{v_{ik}v_{ji}(v_{ik} - d_{ji}\delta)(v_{ji} + d_{ik}\delta)} \\ &< 0. \end{aligned}$$

The last inequality follows from the choice of  $\delta$ . Since the total travel time between vertex  $j$  and vertex  $k$  decreases with the new speeds, with sufficiently small  $\delta$  the vehicle is able to satisfy the time window constraints for all customers while incurring a lower cost. The case with  $v_{ji} > v_{ik}$  can be proven in a similar way.

## 2 Proof of Proposition 2

Let  $\bar{z}$  be a feasible solution to the LP relaxation of (2). For any route  $r \in \Omega_1$  such that  $\bar{z}_r > 0$ , let  $I(r)$  and  $s(r)$  denote the set of active customers and their respective start times when route  $r$  is traversed in an optimal fashion according to optimization problem (3) (if multiple optima exist, one can be picked arbitrarily).

Then, we can define  $z'_{r,I(r),s(r)} = \bar{z}_r$  for all  $r \in \Omega_1$  such that  $\bar{z}_r > 0$  and by definition,  $c_{r,I(r),s(r)} = c_r$ . By having all other components of  $z'$  equal to zero, we have that  $z'$  is a feasible solution to the LP relaxation of (5) with the same cost as  $\bar{z}$ .

Conversely, let  $z'$  be an optimal solution to the LP relaxation of (5). We first note that if  $z'_{r,I,s} > 0$  and  $z'_{r,J,t} > 0$ , then it must be the case that  $c_{r,I,s} = c_{r,J,t}$ . To see that, observe that the coefficients  $\alpha_{ir}$  of both variables in constraints (5b) are the same. Thus, if  $c_{r,I,s} < c_{r,J,t}$  then we can increase  $z'_{r,I,s}$  by  $\epsilon$  and decrease  $z'_{r,J,t}$  by  $\epsilon$  for some  $\epsilon > 0$  and get a feasible solution of strictly smaller cost. In addition, both costs above are the same as the optimal cost  $c_r$  of solving problem (3) for route  $r$ , since otherwise a similar argument can be applied.

Thus, we can define  $\bar{z}_r = \sum_{I,s} z'_{r,I,s}$ . Note that, due to the above observation,  $c_r \bar{z}_r = \sum_{I,s} c_{r,I,s} z'_{r,I,s}$  and thus we get a feasible solution to the LP relaxation of (2) with the same cost as the optimal solution to (5).

## 3 Proof of Proposition 4

Suppose there exists  $L^1$  satisfying conditions 2–4. Let  $(P, v_P) \in E(L^2)$ . For any  $v_2 \in S_v^2$  such that  $(\bar{v}^2, v_2, v_P)$  is a feasible speed vector over  $P^2 \oplus P$ , conditions 1, 2, 3, and (4-a) ensure that there exists  $v_1 \in S_v^1$  such that  $(\bar{v}^1, v_1, v_P)$  is a feasible speed vector over  $P^1 \oplus P$ . Therefore,  $(P, v_P) \in E(L^1)$ .

We are going to show that for any triple  $(P^2 \oplus P, I^2, \mathbf{s}^2)$  induced by  $v_2 \in S_v^2$  that leads to a feasible speed vector  $(\bar{v}^2, v_2, v_P)$  on  $P^2 \oplus P$ , there exists a triple  $(P^1 \oplus P, I^3, \mathbf{s}^3)$  with a smaller reduced cost. It is sufficient to consider the optimal speed vector  $\mathbf{v}^*$  over  $P^2 \oplus P$  that is consistent with label  $L^2$ , i.e., the components of  $\mathbf{v}^*$  from the depot to vertex  $i_{w^2}$  are  $\bar{v}^2$ , and customers after  $i_{w^2}$  and before  $i^2$  (including  $i^2$ ) are all seamless. Let  $v_2^*$  be the component of  $\mathbf{v}^*$  corresponding to

the speed over the arc entering vertex  $i^2$ . Then the vehicle travels along  $P^2 \oplus P$  in the following manner: start from the depot to vertex  $i_{w^2}$  with speed  $\bar{v}^2$ , leave from vertex  $i_{w^2}$  to vertex  $i^2$  with speed  $v_2^*$ , and leave from vertex  $i^2$  back to the depot with speeds  $\mathbf{v}_P^*$ , the components of  $\mathbf{v}^*$  that correspond to  $P$ . Assume that the vehicle returns to the depot at time  $t_{P^2 \oplus P}$ , and the optimal cost on  $P$  is  $F^*$ . Thus the total cost of route  $P^2 \oplus P$  with speed vector  $\mathbf{v}^*$  is  $C^2(v_2) + F^*$ .

Now we show how the route  $P^1 \oplus P$  admits a triple  $(P^1 \oplus P, I^3, \mathbf{s}^3)$  with a better reduced cost than  $(P^2 \oplus P, I^2, \mathbf{s})$  corresponding to the speed vector  $\mathbf{v}^*$ . Since  $v_2 \in S_v^2$ , by (4-a) there exists  $v_1 \in S_v^1$  such that  $T^1(v_1) \leq T^2(v_2)$ . Therefore, it is feasible to travel along  $P^1 \oplus P$  in the following manner: travel from the depot to vertex  $i_{w^1}$  along  $P^1$  with speed vector  $\bar{v}^1$ , travel from vertex  $i_{w^1}$  to vertex  $i^1$  with speed  $v_1$ , finish serving vertex  $i^1$  at  $T^1(v_1)$ , leave vertex  $i^1$  at time  $T^2(v_2)$ , travel along  $P$  using speeds given by the corresponding components in  $\mathbf{v}^*$ , and return to the depot at time  $t_{P^2 \oplus P}$ . Then the total cost of traveling along route  $P^1 \oplus P$  in the above manner is  $C^1(v_1) + F^*$ . Figure 1 illustrates the comparison between  $P^1 \oplus P$  and  $P^2 \oplus P$ .

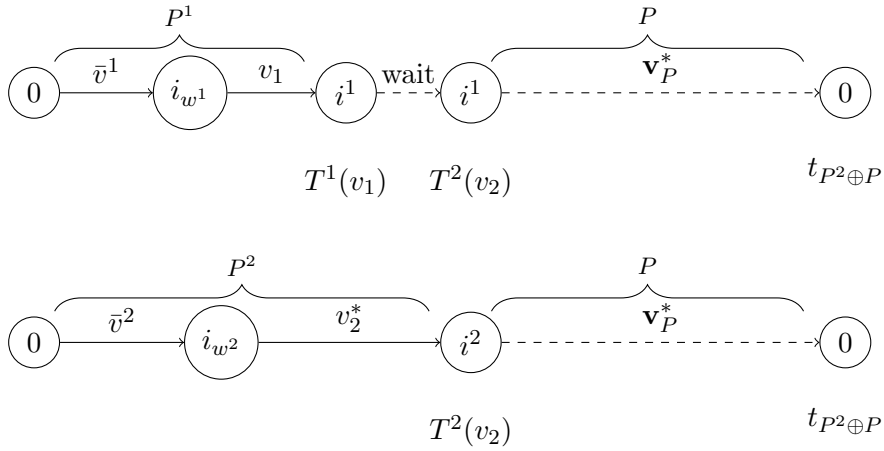

Figure 1: An illustration of comparison between  $P^1 \oplus P$  and  $P^2 \oplus P$ .

Note that traveling along  $P^1 \oplus P$  in the above manner does not necessarily respect the set of active customers in  $L^1$ . Nonetheless it is a feasible way to travel along  $P^1 \oplus P$ . Then there must exist a triple  $(P^1 \oplus P, I^3, \mathbf{s}^3)$  such that  $c_{P^1 \oplus P, I^3, \mathbf{s}^3}$  is at most  $C^1(v_1) + F^*$ . Thus

$$\begin{aligned}
& \bar{c}_{P^1 \oplus P, I^3, \mathbf{s}^3} - \bar{c}_{P^2 \oplus P, I^2, \mathbf{s}} \leq [C^1(v_1) + F^* - (\mu^1 + \mu + \nu)] \\
& - [C^2(v_2) + F^* - (\mu^2 + \mu + \nu)] \\
& = [C^1(v_1) - \mu^1] - [C^2(v_2) - \mu^2] \\
& < 0.
\end{aligned}$$

The last inequality follows from condition (4-b).

## 4 Proof of Proposition 6

To check if Condition (4-b) holds is equivalent to solve a one-dimensional constrained optimization problem with decision variable  $v_2$ . To see this, fix  $v_2 \in [v_2^{\min}, v_2^{\max}]$  and define

$$\phi(v_2) = \min C^1(v_1) \tag{2a}$$

$$\text{s.t. } T^1(v_1) = s^1 + \Gamma^1 + \frac{D^1}{v_1} \leq s^2 + \Gamma^2 + \frac{D^2}{v_2} = T^2(v_2) \tag{2b}$$

$$v_1^{\min} \leq v_1 \leq v_1^{\max}. \tag{2c}$$

Constraint (2b) is equivalent to  $v_1 \geq \beta(v_2)$ . Based on the assumption that Condition (4-a) holds and Proposition 1 in the Appendix, we have  $\beta(v_2^{\max}) \leq v_1^{\max}$ . Thus  $\beta(v_2) \leq v_1^{\max}$  for any  $v_2 \in S_v^2$ . Therefore,  $\phi(v_2) = C^1(v_1^{\min})$  if  $\beta(v_2) \leq v_1^{\min}$  and  $\phi(v_2) = C^1(\beta(v_2))$  otherwise. Define

$$\begin{aligned} \psi(v_2) &= \phi(v_2) - C^2(v_2) \\ z^* &= \max\{\psi(v_2) \mid v_2 \in [v_2^{\min}, v_2^{\max}]\} \end{aligned}$$

Then (4-b) is satisfied if and only if

$$z^* - \mu^1 + \mu^2 < 0.$$

We consider the following three cases to compute  $z^*$ .

1.  $T^1(v_1^{\min}) \leq T^2(v_2^{\max})$ . Then for any  $v \in [v_2^{\min}, v_2^{\max}]$ ,  $v_1^{\min} \geq \beta(v)$  and  $\phi(v) = C^1(v_1^{\min})$ . Thus  $\psi(v) = C^1(v_1^{\min}) - C^2(v)$  and  $z^* = C^1(v_1^{\min}) - C^2(v_2^{\min})$ .
2.  $T^2(v_2^{\max}) < T^1(v_1^{\min}) \leq T^2(v_2^{\min})$ . Then  $\beta(v_2^{\min}) \leq v_1^{\min} < \beta(v_2^{\max})$ . Since  $\beta$  is monotonically increasing by Proposition 1 in the Appendix, there exists  $\tilde{v} \in [v_2^{\min}, v_2^{\max}]$  such that  $\beta(\tilde{v}) = v_1^{\min}$ . In particular,  $\tilde{v} = D^2 v_1^{\min} / (D^1 - \delta v_1^{\min})$ . Then  $\phi(v) = C^1(v_1^{\min})$  for  $v \in [v_2^{\min}, \tilde{v}]$ , and  $\phi(v) = C^1(\beta(v))$  for  $v \in [\tilde{v}, v_2^{\max}]$ .  
When  $v \in [v_2^{\min}, \tilde{v}]$ , the function  $\psi(v) = C^1(v_1^{\min}) - C^2(v)$ . Its maximum is attained at  $C^1(v_1^{\min}) - C^2(v_2^{\min})$ . When  $v \in [\tilde{v}, v_2^{\max}]$ , the function  $\psi(v) = C^1(\beta(v)) - C^2(v) = H(v)$ , which attains its maximum at either  $\tilde{v}, v_2^{\max}$ , or  $v^*$  if it is well defined and  $v^* \in [\tilde{v}, v_2^{\max}]$ . Note that  $\psi(\tilde{v}) = C^1(v_1^{\min}) - C^2(\tilde{v}) \leq C^1(v_1^{\min}) - C^2(v_2^{\min})$ . Therefore from Lemmas 1 and 2 in the Appendix,  $z^*$  equals to the maximum of  $C^1(v_1^{\min}) - C^2(v_2^{\min})$ ,  $C^1(\beta(v_2^{\max})) - C^2(v_2^{\max})$ , or  $C^1(v^*) - C^2(v^*)$  if  $v^*$  is well-defined and  $v^* \in [\tilde{v}, v_2^{\max}]$ .
3.  $T^2(v_2^{\min}) < T^1(v_1^{\min})$ . Then for any  $v_2 \in [v_2^{\min}, v_2^{\max}]$ ,  $\beta(v) > v_1^{\min}$  and  $\phi(v) = C^1(\beta(v))$ . Thus  $\psi(v) = C^1(\beta(v)) - C^2(v) = H(v)$  for any  $v \in [v_2^{\min}, v_2^{\max}]$ . Therefore from Lemmas 1 and 2 in the Appendix, the maximum of  $H(v)$  is attained at  $v_2^{\min}, v_2^{\max}$ , or  $v^*$  if  $v^*$  is well-defined and  $v^* \in [v_2^{\min}, v_2^{\max}]$ .

## 5 Properties of functions $\beta$ and $H$

The following proposition summarizes some properties of function  $\beta$ , where are easy to verify.

**Proposition 1.**

- For any  $v \in [v_2^{\min}, v_2^{\max}]$  and  $\beta(v) \in [v_1^{\min}, v_1^{\max}]$ ,  $T^1(\beta(v)) = T^2(v)$ .
- Function  $\beta$  is monotonically increasing.

- $T^1(v_1) \leq T^2(v_2)$  if and only if  $\beta(v_2) \leq v_1$ . In particular,  $T^1(v_1^{\max}) \leq T^2(v_2^{\max})$  if and only if  $\beta(v_2^{\max}) \leq v_1^{\max}$ .

**Lemma 1.** *When  $v \in [l, u]$ , the derivative of  $H(v)$  is 0 if and only if  $\beta(v) = v$ . If  $v^*$  is well-defined, then the derivative of  $H(v)$  equals to 0 at  $v = v^*$ .*

*Proof.* Since  $H(v) = F_{\text{speed}}^1 + D^1 f(\beta(v)) - F_{\text{speed}}^2 - D^2 f(v)$ , its derivative

$$\begin{aligned}
H'(v) &= D^1 f'(\beta(v))\beta'(v) - D^2 f'(v) \\
&= D^1 f'(\beta(v)) \frac{D^1 D^2}{(D^2/v + \delta)^2 v^2} - D^2 f'(v) \\
&= D^2 f'(\beta(v)) \left( \frac{D^1}{D^2/v + \delta} \right)^2 \frac{1}{v^2} - D^2 f'(v) \\
&= D^2 f'(\beta(v)) \frac{(\beta(v))^2}{v^2} - D^2 f'(v).
\end{aligned}$$

Thus  $H'(v) = 0$  if and only if  $f'(\beta(v))(\beta(v))^2 - G'(v)v^2 = 0$ . The function  $f'(v)v^2$  is strictly increasing for  $v \in [v_F, u]$ , since  $f'(v)$  is non-negative and strictly increasing in  $[v_F, u]$  and  $v^2$  is non-negative and strictly increasing in  $[0, \infty)$ . When  $v \in [v_F, u]$ ,  $f'(\beta(v))(\beta(v))^2 - f'(v)v^2 = 0$  if and only if  $\beta(v) = v$ . When  $v^*$  is well-defined,  $\beta(v) = v$  if and only if  $v = v^*$ .  $\square$

**Lemma 2.** *Suppose  $\delta = 0$ . Then the maximum of  $H(v)$  over an interval  $[v^{\min}, v^{\max}]$  with  $v^{\min} > 0$  is attained at  $v^{\max}$  if  $D^1 > D^2$ , at  $v^{\min}$  if  $D^1 < D^2$ , and at any point in  $[v^{\min}, v^{\max}]$  if  $D^1 = D^2$ .*

*Proof.* When  $D^1 = D^2$ ,  $\beta(v) = v$  for any  $v$  and  $H(v)$  is constant. When  $D^1 > D^2$ ,  $\beta(v) > v$  and  $H'(v) > 0$  for any  $v \in [v^{\min}, v^{\max}]$ , based on the proof of Lemma 1. Thus  $H(v)$  is strictly increasing and its maximum is attained at  $v^{\max}$ . The case of  $D^1 < D^2$  can be proved in a similar way.  $\square$

## 6 Detailed computational results of the BCP algorithms with different route choices for the PRP instances

| Instance | Elementary |      |        |      | 2-cycle-free |      |        |      | q-route |      |        |      |
|----------|------------|------|--------|------|--------------|------|--------|------|---------|------|--------|------|
|          | LP         |      | BUB    | Time | LP           |      | BUB    | Time | LP      |      | BUB    | Time |
|          | Value      | Time |        |      | Value        | Time |        |      | Value   | Time |        |      |
| UK10A-1  | 170.64     | 0.48 | 170.64 | 0.5  | 170.64       | 1.43 | 170.64 | 1.4  | 170.64  | 1.81 | 170.64 | 1.8  |
| UK10A-2  | 204.88     | 0.26 | 204.88 | 0.3  | 204.88       | 1.00 | 204.88 | 1.0  | 204.88  | 1.18 | 204.88 | 1.2  |
| UK10A-3  | 200.34     | 0.70 | 200.34 | 0.7  | 200.34       | 0.88 | 200.34 | 0.9  | 200.34  | 0.53 | 200.34 | 0.5  |
| UK10A-4  | 189.88     | 0.22 | 189.88 | 0.2  | 189.88       | 1.35 | 189.88 | 1.4  | 189.88  | 1.40 | 189.88 | 3.5  |
| UK10A-5  | 175.59     | 0.50 | 175.59 | 0.5  | 175.59       | 3.40 | 175.59 | 3.4  | 175.59  | 2.85 | 175.59 | 2.9  |
| UK10A-6  | 214.48     | 0.24 | 214.48 | 0.2  | 214.48       | 0.53 | 214.48 | 0.5  | 214.48  | 0.78 | 214.48 | 0.8  |
| UK10A-7  | 190.14     | 0.12 | 190.14 | 0.1  | 190.14       | 1.74 | 190.14 | 1.7  | 190.14  | 2.81 | 190.14 | 2.8  |
| UK10A-8  | 222.17     | 0.03 | 222.17 | 0.0  | 222.17       | 0.15 | 222.17 | 0.1  | 222.17  | 0.14 | 222.17 | 0.1  |
| UK10A-9  | 174.54     | 0.12 | 174.54 | 0.1  | 174.54       | 2.07 | 174.54 | 2.1  | 174.54  | 6.69 | 174.54 | 6.7  |
| UK10A-10 | 189.82     | 0.39 | 189.82 | 0.4  | 189.82       | 0.42 | 189.82 | 0.4  | 189.82  | 0.59 | 189.82 | 0.6  |
| UK10B-1  | 246.44     | 0.01 | 246.44 | 0.0  | 246.44       | 0.01 | 246.44 | 0.0  | 246.44  | 0.01 | 246.44 | 0.0  |
| UK10B-2  | 303.73     | 0.01 | 303.73 | 0.0  | 303.73       | 0.01 | 303.73 | 0.0  | 303.73  | 0.01 | 303.73 | 0.0  |
| UK10B-3  | 301.89     | 0.01 | 301.89 | 0.0  | 301.89       | 0.01 | 301.89 | 0.0  | 301.89  | 0.01 | 301.89 | 0.0  |
| UK10B-4  | 273.90     | 0.01 | 273.90 | 0.0  | 273.90       | 0.01 | 273.90 | 0.0  | 273.90  | 0.02 | 273.90 | 0.0  |
| UK10B-5  | 255.07     | 0.01 | 255.07 | 0.0  | 255.47       | 0.00 | 255.10 | 0.0  | 255.47  | 0.00 | 255.07 | 0.0  |
| UK10B-6  | 332.34     | 0.01 | 332.34 | 0.0  | 332.34       | 0.01 | 332.34 | 0.0  | 332.34  | 0.01 | 332.34 | 0.0  |
| UK10B-7  | 308.85     | 0.00 | 314.64 | 0.1  | 308.85       | 0.00 | 314.64 | 0.1  | 304.91  | 0.00 | 314.64 | 0.1  |
| UK10B-8  | 333.12     | 0.00 | 339.32 | 0.0  | 333.11       | 0.00 | 339.32 | 0.0  | 333.12  | 0.00 | 339.32 | 0.0  |
| UK10B-9  | 261.10     | 0.01 | 261.10 | 0.0  | 261.10       | 0.00 | 261.10 | 0.0  | 261.10  | 0.01 | 261.10 | 0.0  |
| UK10B-10 | 285.20     | 0.01 | 285.20 | 0.0  | 285.20       | 0.01 | 285.20 | 0.0  | 285.20  | 0.00 | 285.20 | 0.0  |
| UK10C-1  | 210.21     | 0.02 | 210.21 | 0.0  | 210.18       | 0.05 | 210.18 | 0.1  | 209.66  | 0.10 | 210.18 | 0.2  |
| UK10C-2  | 271.93     | 0.03 | 271.93 | 0.0  | 268.93       | 0.10 | 271.93 | 0.3  | 265.77  | 0.20 | 271.93 | 1.1  |
| UK10C-3  | 229.18     | 0.03 | 229.18 | 0.0  | 229.18       | 0.05 | 229.18 | 0.1  | 227.41  | 0.20 | 229.18 | 0.5  |
| UK10C-4  | 230.52     | 0.01 | 230.52 | 0.0  | 227.31       | 0.00 | 230.52 | 0.2  | 222.99  | 0.10 | 230.52 | 6.2  |
| UK10C-5  | 205.49     | 0.02 | 205.49 | 0.0  | 205.49       | 0.08 | 205.49 | 0.1  | 203.33  | 0.30 | 205.49 | 0.8  |
| UK10C-6  | 255.82     | 0.02 | 255.82 | 0.0  | 255.82       | 0.03 | 255.82 | 0.0  | 254.48  | 0.10 | 255.82 | 0.1  |
| UK10C-7  | 217.79     | 0.03 | 217.79 | 0.0  | 217.79       | 0.07 | 217.79 | 0.1  | 217.79  | 0.33 | 217.79 | 0.3  |
| UK10C-8  | 251.29     | 0.03 | 251.29 | 0.0  | 251.29       | 0.02 | 251.29 | 0.0  | 251.29  | 0.10 | 251.29 | 0.1  |
| UK10C-9  | 186.04     | 0.06 | 186.04 | 0.1  | 186.04       | 0.12 | 186.04 | 0.1  | 186.04  | 0.09 | 186.04 | 0.1  |
| UK10C-10 | 231.62     | 0.04 | 231.62 | 0.0  | 231.62       | 0.02 | 231.62 | 0.0  | 230.93  | 0.10 | 231.62 | 0.2  |

Table 1: Results of the BCP algorithms under different route choices for the PRP instances with 10 customers

| Instance | elementary |      |         |      | 2-cycle-free |      |         |      | q-route |      |        |              |
|----------|------------|------|---------|------|--------------|------|---------|------|---------|------|--------|--------------|
|          | LP         |      | BUB     | Time | LP           |      | BUB     | Time | LP      |      | BUB    | Time/<br>Gap |
|          | Value      | Time |         |      | Value        | Time |         |      | Value   | Time |        |              |
| UK20A-1  | 351.82     | 26.5 | 351.82  | 26.5 | 351.69       | 41.6 | 351.82  | 64.0 | 350.46  | 14.5 | 351.82 | 19.4         |
| UK20A-2  | 365.77     | 31.5 | 365.77  | 31.5 | 365.77       | 16.7 | 365.77  | 16.7 | 365.77  | 4.68 | 365.77 | 4.7          |
| UK20A-3  | 230.49     | 1204 | 230.49  | 1204 | 230.49       | 556  | 230.49  | 556  | 230.49  | 52.9 | 230.49 | 52.9         |
| UK20A-4  | 347.04     | 2370 | 347.04  | 2370 | 347.04       | 659  | 347.04  | 659  | 347.04  | 59.4 | 347.04 | 59.4         |
| UK20A-5  | 323.44     | 154  | 323.44  | 154  | 323.44       | 134  | 323.44  | 134  | 323.31  | 17.3 | 323.44 | 28.7         |
| UK20A-6  | 364.11     | 437  | 364.23  | 757  | 364.11       | 40.5 | 364.23  | 94.6 | 363.67  | 6.00 | 364.23 | 17.0         |
| UK20A-7  | -          | -    | 3318.70 | -    | -            | -    | 3016.70 | -    | 253.43  | 2429 | 253.61 | 0.1%         |
| UK20A-8  | 301.51     | 151  | 301.51  | 151  | 301.51       | 50.1 | 301.51  | 50.1 | 301.51  | 15.9 | 301.51 | 15.9         |
| UK20A-9  | 362.56     | 38.6 | 362.56  | 38.6 | 362.56       | 98.3 | 362.56  | 98.3 | 362.56  | 11.4 | 362.56 | 11.4         |
| UK20A-10 | 313.33     | 455  | 313.33  | 455  | 313.33       | 231  | 313.33  | 231  | 313.33  | 16.7 | 313.33 | 16.7         |
| UK20B-1  | 469.35     | 0.04 | 469.35  | 0.0  | 469.35       | 0.04 | 469.35  | 0.0  | 469.35  | 0.04 | 469.35 | 0.0          |
| UK20B-2  | 477.05     | 0.18 | 477.05  | 0.2  | 477.05       | 0.06 | 477.05  | 0.1  | 477.05  | 0.10 | 477.05 | 0.1          |
| UK20B-3  | 354.46     | 0.11 | 354.46  | 0.1  | 354.46       | 0.11 | 354.46  | 0.1  | 354.46  | 0.11 | 354.46 | 0.1          |
| UK20B-4  | 523.59     | 0.12 | 523.59  | 0.1  | 523.59       | 0.08 | 523.59  | 0.1  | 523.59  | 0.15 | 523.59 | 0.1          |
| UK20B-5  | 447.33     | 0.08 | 447.33  | 0.1  | 447.33       | 0.07 | 447.33  | 0.1  | 439.38  | 0.20 | 447.33 | 1.2          |
| UK20B-6  | 511.11     | 0.40 | 511.78  | 1.4  | 511.11       | 0.10 | 511.78  | 0.4  | 511.78  | 1.34 | 511.78 | 1.3          |
| UK20B-7  | 377.94     | 1.60 | 379.02  | 4.0  | 379.02       | 0.62 | 379.02  | 0.6  | 377.57  | 0.30 | 379.02 | 0.4          |
| UK20B-8  | 418.00     | 0.10 | 431.31  | 0.3  | 418.00       | 0.10 | 431.31  | 0.6  | 416.64  | 0.10 | 431.31 | 1.7          |
| UK20B-9  | 545.37     | 0.10 | 548.68  | 0.1  | 545.37       | 0.10 | 548.68  | 0.1  | 548.68  | 0.23 | 548.68 | 0.2          |
| UK20B-10 | 410.32     | 0.04 | 410.32  | 0.0  | 410.32       | 0.03 | 410.32  | 0.0  | 407.96  | 0.10 | 410.32 | 0.2          |
| UK20C-1  | 432.35     | 0.73 | 432.35  | 0.7  | 424.06       | 1.30 | 432.35  | 90.3 | 420.38  | 1.60 | 432.35 | 0.9%         |
| UK20C-2  | 445.64     | 2.00 | 448.29  | 12.9 | 444.96       | 1.30 | 448.29  | 4.4  | 442.07  | 1.00 | 448.29 | 7.7          |
| UK20C-3  | 287.48     | 4.39 | 287.48  | 4.4  | 287.20       | 2.90 | 287.48  | 4.1  | 281.39  | 3.40 | 287.04 | 76.2         |
| UK20C-4  | 432.55     | 0.90 | 434.23  | 2.9  | 431.69       | 0.90 | 434.23  | 4.4  | 422.25  | 1.5  | 434.23 | 0.7%         |
| UK20C-5  | 380.28     | 1.70 | 381.70  | 6.1  | 379.85       | 1.40 | 381.70  | 4.5  | 375.64  | 1.60 | 381.70 | 41.9         |
| UK20C-6  | 441.43     | 2.50 | 444.35  | 23.4 | 439.28       | 1.10 | 444.35  | 28.9 | 438.56  | 0.80 | 444.35 | 16.3         |
| UK20C-7  | 317.73     | 800  | 317.73  | 800  | 317.44       | 52.0 | 317.73  | 63.1 | 308.47  | 34.8 | 317.73 | 0.9%         |
| UK20C-8  | 410.35     | 0.57 | 410.35  | 0.6  | 410.35       | 0.52 | 410.35  | 0.5  | 410.16  | 1.00 | 410.35 | 1.4          |
| UK20C-9  | 421.39     | 0.25 | 421.39  | 0.2  | 421.39       | 0.49 | 421.39  | 0.5  | 410.48  | 1.30 | 421.39 | 44.3         |
| UK20C-10 | 384.88     | 0.54 | 384.88  | 0.5  | 380.30       | 1.20 | 384.88  | 13.7 | 373.95  | 1.90 | 384.88 | 130          |

Table 2: Results of the BCP algorithms under different route choices for the PRP instances with 20 customers

| Instance | Elementary |      |         |              | 2-cycle-free |      |         |              | q-route |      |         |              |
|----------|------------|------|---------|--------------|--------------|------|---------|--------------|---------|------|---------|--------------|
|          | LP         |      | BUB     | Time/<br>Gap | LP           |      | BUB     | Time/<br>Gap | LP      |      | BUB     | Time/<br>Gap |
|          | Value      | Time |         |              | Value        | Time |         |              | Value   | Time |         |              |
| UK25A-1  | -          | -    | 3316.14 | -            | -            | -    | 389.46  | -            | 316.18  | 304  | 316.18  | 304          |
| UK25A-2  | -          | -    | 397.10  | -            | -            | -    | 373.92  | -            | 373.92  | 1244 | 373.92  | 1562         |
| UK25A-3  | -          | -    | 268.46  | -            | -            | -    | 273.08  | -            | -       | -    | 3591.44 | -            |
| UK25A-4  | -          | -    | 677.11  | -            | -            | -    | 321.14  | -            | -       | -    | 880.80  | -            |
| UK25A-5  | -          | -    | 3932.00 | -            | 365.00       | 2925 | 365.00  | 2925         | 365.00  | 169  | 365.00  | 169          |
| UK25A-6  | -          | -    | 397.30  | -            | -            | -    | 313.72  | -            | 312.22  | 552  | 316.83  | 1.2%         |
| UK25A-7  | -          | -    | 467.97  | -            | -            | -    | 3431.12 | -            | 350.72  | 610  | 350.72  | 610          |
| UK25A-8  | 359.08     | 1432 | 359.08  | 1432         | 359.08       | 1107 | 359.08  | 1107         | 358.69  | 84.1 | 359.08  | 118          |
| UK25A-9  | -          | -    | 346.40  | -            | -            | -    | 380.68  | -            | 325.91  | 184  | 330.60  | 0.9%         |
| UK25A-10 | -          | -    | 411.33  | -            | -            | -    | 411.33  | -            | 411.33  | 3503 | 411.33  | 3503         |
| UK25B-1  | 474.35     | 2.20 | 475.13  | 6.5          | 474.35       | 0.60 | 475.13  | 1.0          | 473.63  | 0.50 | 475.13  | 1.3          |
| UK25B-2  | 530.00     | 8.60 | 533.59  | 141          | 530.00       | 0.50 | 533.59  | 10.6         | 533.59  | 63.6 | 533.59  | 63.6         |
| UK25B-3  | 390.17     | 15.7 | 390.27  | 37.9         | 390.17       | 1.80 | 390.27  | 2.6          | 388.45  | 1.90 | 390.27  | 9.1          |
| UK25B-4  | 467.49     | 239  | 467.49  | 239          | 458.56       | 0.80 | 467.49  | 132          | 449.56  | 0.80 | 467.49  | 1.4%         |
| UK25B-5  | 489.16     | 192  | 491.69  | 1286         | 489.16       | 2.50 | 491.69  | 11.2         | 488.80  | 1.60 | 491.69  | 10.0         |
| UK25B-6  | 515.46     | 1.00 | 516.71  | 16.0         | 515.46       | 0.30 | 516.71  | 1.5          | 514.11  | 0.40 | 516.71  | 6.5          |
| UK25B-7  | 525.68     | 120  | 526.12  | 164          | 524.90       | 0.70 | 526.12  | 2.3          | 525.69  | 0.40 | 526.12  | 2.0          |
| UK25B-8  | 534.38     | 1.60 | 537.93  | 126          | 533.59       | 0.40 | 537.15  | 3.5          | 533.38  | 0.50 | 537.15  | 3.1          |
| UK25B-9  | 436.23     | 218  | 436.84  | 464          | 436.23       | 1.70 | 436.84  | 2.8          | 434.89  | 1.40 | 436.84  | 3.5          |
| UK25B-10 | 531.86     | 13.5 | 533.88  | 126          | 531.86       | 1.00 | 533.88  | 5.0          | 531.10  | 0.90 | 533.88  | 3.4          |
| UK25C-1  | 417.59     | 1826 | 417.59  | 1826         | 416.88       | 52.9 | 417.59  | 163          | 409.86  | 61.9 | 417.59  | 0.7%         |
| UK25C-2  | 467.87     | 1506 | 468.95  | 0.1%         | 467.51       | 53.7 | 468.95  | 548          | 453.86  | 25.3 | 481.59  | 4.0%         |
| UK25C-3  | -          | -    | 425.39  | -            | 326.31       | 329  | 328.47  | 0.1%         | 323.41  | 55.0 | 329.34  | 1.1%         |
| UK25C-4  | 388.98     | 48.4 | 389.56  | 77.8         | 386.21       | 3.60 | 391.34  | 1.3%         | 367.54  | 33.4 | 391.11  | 4.4%         |
| UK25C-5  | -          | -    | 1444.90 | -            | -            | -    | 458.55  | -            | -       | -    | 456.58  | -            |
| UK25C-6  | 415.31     | 436  | 418.12  | 0.3%         | 415.29       | 8.80 | 418.12  | 135          | 412.09  | 5.30 | 418.12  | 0.4%         |
| UK25C-7  | -          | -    | 727.00  | -            | 478.25       | 48.1 | 482.31  | 0.4%         | 473.62  | 13.8 | 481.75  | 1.2%         |
| UK25C-8  | 497.49     | 158  | 499.18  | 560          | 496.31       | 8.00 | 499.18  | 30.5         | 481.75  | 4.40 | 499.18  | 1.1%         |
| UK25C-9  | 406.22     | 109  | 413.28  | 1.0%         | 405.99       | 7.50 | 412.51  | 520          | 400.25  | 6.20 | 412.51  | 1.1%         |
| UK25C-10 | 509.00     | 1441 | 551.17  | 8.3%         | 508.78       | 40.6 | 513.37  | 0.4%         | 497.67  | 4.80 | 513.47  | 1.5%         |

Table 3: Results of the BCP algorithms under different route choices for the PRP instances with 25 customers

| Instance | Elementary |      |         |              | 2-cycle-free |      |         |              | q-routes |      |         |              |
|----------|------------|------|---------|--------------|--------------|------|---------|--------------|----------|------|---------|--------------|
|          | LP         |      | BUB     | Time/<br>Gap | LP           |      | BUB     | Time/<br>Gap | LP       |      | BUB     | Time/<br>Gap |
|          | Value      | Time |         |              | Value        | Time |         |              | Value    | Time |         |              |
| UK50A-1  | -          | -    | 2748.2  | -            | -            | -    | 689.6   | -            | 673.3    | 1884 | 6425.2  | 846%         |
| UK50A-2  | -          | -    | 3119.9  | -            | -            | -    | 929.3   | -            | 668.5    | 3583 | 668.5   | 3583         |
| UK50A-3  | -          | -    | 7512.3  | -            | -            | -    | 7750.3  | -            | 688.2    | 544  | 988.6   | 43%          |
| UK50A-4  | -          | -    | 3653.8  | -            | -            | -    | 4085.5  | -            | -        | -    | 3845.7  | -            |
| UK50A-5  | -          | -    | 2847.0  | -            | -            | -    | 7434.9  | -            | 702.2    | 421  | 706.3   | 0.4%         |
| UK50A-6  | -          | -    | 3464.4  | -            | -            | -    | 6697.3  | -            | 631.3    | 1621 | 631.3   | 1621         |
| UK50A-7  | -          | -    | 833.9   | -            | -            | -    | 7774.5  | -            | -        | -    | 6758.5  | -            |
| UK50A-8  | -          | -    | 650.6   | -            | -            | -    | 638.9   | -            | 636.9    | 1052 | 638.5   | 0.1%         |
| UK50A-9  | -          | -    | 7292.9  | -            | -            | -    | 3728.1  | -            | -        | -    | 786.0   | -            |
| UK50A-10 | -          | -    | 2182.7  | -            | -            | -    | 7369.2  | -            | -        | -    | 6533.2  | -            |
| UK50B-1  | -          | -    | 3055.38 | -            | 984.90       | 6.80 | 992.15  | 0.3%         | 978.67   | 4.70 | 992.00  | 0.7%         |
| UK50B-2  | -          | -    | 1887.07 | -            | 1021.91      | 5.90 | 1028.01 | 0.0%         | 1018.19  | 4.80 | 1028.01 | 0.4%         |
| UK50B-3  | 1013.47    | 1807 | 8857.58 | 774.0%       | 1013.44      | 8.40 | 1022.40 | 0.5%         | 1009.38  | 10.1 | 1022.69 | 0.8%         |
| UK50B-4  | 1141.88    | 596  | 2624.56 | 129.8%       | 1141.85      | 5.50 | 1149.08 | 1985         | 1140.73  | 3.30 | 1149.08 | 3408         |
| UK50B-5  | 963.84     | 61.6 | 964.72  | 185          | 963.84       | 4.00 | 964.72  | 6.8          | 960.57   | 1.70 | 964.72  | 14.8         |
| UK50B-6  | -          | -    | 8962.33 | -            | 911.64       | 14.5 | 921.95  | 0.8%         | 907.76   | 7.50 | 924.94  | 1.4%         |
| UK50B-7  | -          | -    | 3407.17 | -            | 847.84       | 16.2 | 852.33  | 1022         | 839.92   | 8.20 | 852.33  | 0.8%         |
| UK50B-8  | 924.43     | 50.5 | 924.43  | 50.5         | 924.43       | 3.62 | 924.43  | 3.6          | 923.90   | 6.20 | 924.43  | 13.8         |
| UK50B-9  | 1027.56    | 2472 | 1592.42 | 55.0%        | 1027.41      | 3.40 | 1034.92 | 2252         | 1023.36  | 2.50 | 1036.14 | 0.4%         |
| UK50B-10 | -          | -    | 8504.07 | -            | 1022.60      | 83.2 | 1026.80 | 0.2%         | 1017.29  | 17.9 | 1033.92 | 1.2%         |
| UK50C-1  | -          | -    | 8400.51 | -            | 900.91       | 308  | 1198.26 | 32.8%        | 886.64   | 57.3 | 1243.50 | 38.8%        |
| UK50C-2  | -          | -    | 1846.43 | -            | 884.84       | 771  | 1227.79 | 38.6%        | 872.69   | 73.1 | 1387.62 | 58.2%        |
| UK50C-3  | -          | -    | 4949.76 | -            | 851.70       | 680  | 1015.20 | 19.0%        | 844.60   | 65.8 | 869.18  | 2.5%         |
| UK50C-4  | -          | -    | 7966.25 | -            | 996.01       | 200  | 1003.43 | 0.5%         | 990.32   | 38.5 | 1002.20 | 0.8%         |
| UK50C-5  | 916.44     | 2018 | 8394.03 | 815.9%       | 914.41       | 48.6 | 925.85  | 1.0%         | 902.56   | 22.1 | 1177.71 | 29.5%        |
| UK50C-6  | -          | -    | 7557.40 | -            | 792.78       | 1033 | 2607.89 | 228.5%       | 784.36   | 50.6 | 1569.29 | 99.4%        |
| UK50C-7  | -          | -    | 1754.22 | -            | 851.59       | 508  | 852.67  | 0.0%         | 834.81   | 64.0 | 895.22  | 6.4%         |
| UK50C-8  | -          | -    | 826.66  | -            | 789.03       | 463  | 1233.17 | 56.0%        | 782.84   | 87.6 | 2643.45 | 236.6%       |
| UK50C-9  | 959.55     | 331  | 962.69  | 0.2%         | 957.10       | 32.5 | 962.69  | 0.2%         | 951.46   | 12.2 | 963.40  | 0.8%         |
| UK50C-10 | -          | -    | 4547.35 | -            | -            | -    | 8330.19 | -            | 959.03   | 152  | 985.50  | 2.5%         |

Table 4: Results of the BCP algorithms under different route choices for the PRP instances with 50 customers

## References

- [1] Ricardo Fukasawa, Qie He, Fernando Santos, and Yongjia Song. A joint vehicle routing and speed optimization problem. To appear in *INFORMS Journal on Computing*, 2018.
